# Supplementary material for: Genome-Wide Analysis of WRKY Transcription Factors Involved in Abiotic Stress and ABA Response in Caragana korshinskii
Source: MDPI journal article supplement (doi:10.3390/ijms24119519), 2023-05-30
Supplement: s1 [file s1]

**Table S4.** Gene name of Ortholog in *C. intermedia*.

| New name of gene | Published <i>CkWRKYs</i> | Ortholog in <i>C. intermedia</i> [1] |
|------------------|--------------------------|--------------------------------------|
| <i>CkWRKY1</i>   | -                        | -                                    |
| <i>CkWRKY2</i>   | -                        | <i>CiWRKY12</i> [2]                  |
| <i>CkWRKY3</i>   | -                        | <i>CiWRKY30</i> [3]                  |
| <i>CkWRKY4</i>   | -                        | -                                    |
| <i>CkWRKY5</i>   | -                        | -                                    |
| <i>CkWRKY6</i>   | -                        | <i>CiWRKY36</i>                      |
| <i>CkWRKY7</i>   | -                        | <i>CiWRKY32-1</i>                    |
| <i>CkWRKY8</i>   | -                        | -                                    |
| <i>CkWRKY9</i>   | -                        | -                                    |
| <i>CkWRKY10</i>  | -                        | <i>CiWRKY48</i> [4]                  |
| <i>CkWRKY11</i>  | -                        | -                                    |
| <i>CkWRKY12</i>  | -                        | <i>CiWRKY2</i>                       |
| <i>CkWRKY13</i>  | -                        | -                                    |
| <i>CkWRKY14</i>  | -                        | -                                    |
| <i>CkWRKY15</i>  | -                        | -                                    |
| <i>CkWRKY16</i>  | -                        | -                                    |
| <i>CkWRKY17</i>  | -                        | -                                    |
| <i>CkWRKY18</i>  | -                        | -                                    |
| <i>CkWRKY19</i>  | -                        | <i>CiWRKY70-1</i>                    |
| <i>CkWRKY20</i>  | -                        | -                                    |
| <i>CkWRKY21</i>  | -                        | -                                    |
| <i>CkWRKY22</i>  | -                        | <i>CiWRKY40-4/ 45</i> [5]            |
| <i>CkWRKY23</i>  | -                        | -                                    |
| <i>CkWRKY24</i>  | -                        | <i>CiWRKY23</i>                      |
| <i>CkWRKY25</i>  | -                        | -                                    |
| <i>CkWRKY26</i>  | -                        | -                                    |
| <i>CkWRKY27</i>  | -                        | <i>CiWRKY17</i> [6]                  |
| <i>CkWRKY28</i>  | -                        | -                                    |
| <i>CkWRKY29</i>  | -                        | <i>CiWRKY40-3</i>                    |
| <i>CkWRKY30</i>  | -                        | <i>CiWRKY50</i>                      |
| <i>CkWRKY31</i>  | -                        | -                                    |
| <i>CkWRKY32</i>  | -                        | -                                    |
| <i>CkWRKY33</i>  | -                        | -                                    |
| <i>CkWRKY34</i>  | -                        | <i>CiWRKY41-1</i>                    |
| <i>CkWRKY35</i>  | <i>CkWRKY1</i> [7]       | <i>CiWRKY40-1</i>                    |
| <i>CkWRKY36</i>  | -                        | -                                    |
| <i>CkWRKY37</i>  | -                        | <i>CiWRKY51</i>                      |
| <i>CkWRKY38</i>  | -                        | <i>CiWRKY28-1</i> [8]                |
| <i>CkWRKY39</i>  | -                        | -                                    |
| <i>CkWRKY40</i>  | -                        | -                                    |
| <i>CkWRKY41</i>  | -                        | <i>CiWRKY6-1</i>                     |
| <i>CkWRKY42</i>  | -                        | -                                    |
| <i>CkWRKY43</i>  | -                        | -                                    |
| <i>CkWRKY44</i>  | -                        | -                                    |
| <i>CkWRKY45</i>  | -                        | -                                    |
| <i>CkWRKY46</i>  | -                        | -                                    |
| <i>CkWRKY47</i>  | -                        | -                                    |
| <i>CkWRKY48</i>  | -                        | -                                    |

|          |             |                      |
|----------|-------------|----------------------|
| CkWRKY49 | -           | -                    |
| CkWRKY50 | CkWRKY33[9] | CiWRKY33-1           |
| CkWRKY51 | -           | -                    |
| CkWRKY52 | -           | CiWRKY75-1[10]/ 6[5] |
| CkWRKY53 | -           | -                    |
| CkWRKY54 | -           | -                    |
| CkWRKY55 | -           | -                    |
| CkWRKY56 | -           | -                    |
| CkWRKY57 | -           | -                    |
| CkWRKY58 | -           | -                    |
| CkWRKY59 | -           | -                    |
| CkWRKY60 | -           | CiWRKY69-1           |
| CkWRKY61 | -           | -                    |
| CkWRKY62 | -           | -                    |
| CkWRKY63 | -           | -                    |
| CkWRKY64 | -           | -                    |
| CkWRKY65 | -           | -                    |
| CkWRKY66 | -           | -                    |
| CkWRKY67 | -           | CiWRKY6-2            |
| CkWRKY68 | -           | -                    |
| CkWRKY69 | -           | -                    |
| CkWRKY70 | -           | -                    |
| CkWRKY71 | -           | CiWRKY28-2           |
| CkWRKY72 | -           | CiWRKY26[8]/ 2[11]   |
| CkWRKY73 | -           | -                    |
| CkWRKY74 | -           | -                    |
| CkWRKY75 | -           | -                    |
| CkWRKY76 | -           | CiWRKY57             |
| CkWRKY77 | -           | CiWRKY3-1            |
| CkWRKY78 | -           | CiWRKY15[12]         |
| CkWRKY79 | -           | -                    |
| CkWRKY80 | -           | -                    |
| CkWRKY81 | -           | -                    |
| CkWRKY82 | -           | -                    |
| CkWRKY83 | -           | -                    |
| CkWRKY84 | -           | -                    |
| CkWRKY85 | -           | CiWRKY3-2            |
| CkWRKY86 | -           | -                    |

## Reference

1. Wan, Y., et al., Identification of the WRKY gene family and functional analysis of two genes in *Caragana intermedia*. BMC Plant Biol, 2018. 18(1): p. 31.
2. Wan, D., et al., Cloning and Bioinformatics Analysis of *Caragana intermedia* WRKY12 gene. Molecular Plant Breeding, 2020. 18(1): p. 9.
3. Liu, J., et al., Cloning and Bioinformatics Analysis of *Caragana intermedia* WRKY30. Molecular Plant Breeding, 2019. 17(14): p. 10.
4. Liu, J., et al., Cloning and prokaryotic expression of WRKY48 from *Caragana intermedia*. Open Life Sci, 2022. 17(1): p. 131-138.
5. Mao, M., Functional analysis of Two WRKY Genes in *Caragana intermedia*. 2017, Inner Mongolia Agricultural University.
6. Bai, M., et al., Cloning and Bioinformatics Analysis of CiWRKY17 Gene. Genomics and Applied Biology, 2020. 39(8): p. 9.

7. Yang, Q., Construction of a Suppression Subtractive Hybridization Library of *Caragana korshinskii* Under Drought Stress and Cloning of *CkWRKY1* Gene. *SCIENTIA SILVAE SINICAE*, 2013. 49(7): p. 62-68.
8. Wan, Y., Identification of the WRKY Gene Family and Functional Analysis of Two CiWRKYs in *Caragana intermedia*. 2018, Inner Mongolia Agricultural University.
9. Li, Z., et al., Enhanced tolerance to drought stress resulting from *Caragana korshinskii* CkWRKY33 in transgenic *Arabidopsis thaliana*. *BMC Genom Data*, 2021. 22(1): p. 11.
10. Wan, Y., et al., *Caragana intermedia* WRKY75 Altered *Arabidopsis thaliana* Tolerance to Salt Stress and ABA. *Acta Botanica Boreali-Occidentalia Sinica*, 2018. 38(1): p. 9.
11. Mao, M., et al., Cloning and Expression Analysis of CiWRKY2 Gene in *Caragana intermedia*. *Molecular Plant Breeding*, 2017. 15(4): p. 9.
12. Zhang, W., et al., Cloning and Bioinformatics Analysis of *Caragana intermedia* WRKY15. *Chinese Journal of Grassland*, 2019(4): p. 9.
